# Supplementary material for: Tuning different kinds of entangled metal–organic frameworks by modifying the spacer group of aliphatic dicarboxylate ligands and the reactant ratio
Source: Royal Society of Chemistry journal article supplement (doi:10.1039/c5dt03731j), 2015-11-04
Supplement: c5dt03731j1.pdf [file c5dt03731j1.pdf]

Supporting information for

**Tuning Different Kinds of Entangled Metal-organic Frameworks through Modifying the Spacer Group of Aliphatic Dicarboxylate Ligands and Reactant Ratio †**

Jin-Xia Yang,<sup>a</sup> Ji-Quan Zhai,<sup>ab</sup> Xin Zhang,<sup>a</sup> Ye-Yan Qin,<sup>a</sup> Yuan-Gen Yao<sup>a,\*</sup>

Received (in XXX, XXX) Xth XXXXXXXXXX 201X, Accepted Xth XXXXXXXXXX 201X

First published on the web Xth XXXXXXXXXX 201X

DOI: 10.1039/b000000x

<sup>a</sup> Key Laboratory of Coal to Ethylene Glycol and Its Related Technology,

Fujian Institute of Research on the Structure of Matter, Chinese Academy of Sciences, Fuzhou 350002, P. R. China E-mail:yyg@fjirsm.ac.cn.

<sup>b</sup> College of Chemistry, Fuzhou University, Fuzhou, Fujian 350116 (P. R. China).

**Table S1** Selected bond lengths (Å) and angles (°) for **1**.

|                                            |            |                                            |            |
|--------------------------------------------|------------|--------------------------------------------|------------|
| Cd(1)-N(2) <sup>a</sup>                    | 2.321(3)   | Cd(1)-O(3) <sup>b</sup>                    | 2.330(3)   |
| Cd(1)-O(1w)                                | 2.330(3)   | Cd(1)-N(1)                                 | 2.350(3)   |
| Cd(1)-O(1)                                 | 2.374(3)   | Cd(1)-O(4) <sup>b</sup>                    | 2.574(3)   |
| Cd(1)-O(2)                                 | 2.584(3)   |                                            |            |
| N(2) <sup>a</sup> -Cd(1)-O(3) <sup>b</sup> | 138.10(10) | N(2) <sup>a</sup> -Cd(1)-O(1w)             | 90.71(12)  |
| O(3) <sup>b</sup> -Cd(1)-O(1w)             | 90.51(10)  | N(2) <sup>a</sup> -Cd(1)-N(1)              | 93.80(12)  |
| O(3) <sup>b</sup> -Cd(1)-N(1)              | 86.63(11)  | O(1w)-Cd(1)-N(1)                           | 175.43(10) |
| N(2) <sup>a</sup> -Cd(1)-O(1)              | 135.80(10) | O(3) <sup>b</sup> -Cd(1)-O(1)              | 86.00(11)  |
| O(1w)-Cd(1)-O(1)                           | 91.77(10)  | N(1)-Cd(1)-O(1)                            | 84.48(11)  |
| N(2) <sup>a</sup> -Cd(1)-O(4) <sup>b</sup> | 85.40(9)   | O(3) <sup>b</sup> -Cd(1)-O(4) <sup>b</sup> | 52.94(9)   |
| O(1w)-Cd(1)-O(4) <sup>b</sup>              | 85.91(9)   | N(1)-Cd(1)-O(4) <sup>b</sup>               | 95.18(10)  |
| O(1)-Cd(1)-O(4) <sup>b</sup>               | 138.79(9)  | N(2) <sup>a</sup> -Cd(1)-O(2)              | 83.69(9)   |
| O(3) <sup>b</sup> -Cd(1)-O(2)              | 138.21(10) | O(1w)-Cd(1)-O(2)                           | 88.14(10)  |
| N(1)-Cd(1)-O(2)                            | 91.62(10)  | O(1)-Cd(1)-O(2)                            | 52.32(9)   |
| O(4) <sup>b</sup> -Cd(1)-O(2)              | 167.49(9)  |                                            |            |

Symmetry codes: (a):  $x, y, 1+z$ ; (b)  $-2-x, 0.5+y, 0.5-z$ .

**Table S2** Selected bond lengths (Å) and angles (°) for **2**.

|                               |           |                               |           |
|-------------------------------|-----------|-------------------------------|-----------|
| Cd(1)-N(2) <sup>a</sup>       | 2.338(10) | Cd(1)-N(1)                    | 2.340(11) |
| Cd(1)-N(3)                    | 2.369(12) | Cd(1)-O(4)                    | 2.385(8)  |
| Cd(1)-O(2)                    | 2.391(8)  | Cd(1)-O(1)                    | 2.447(8)  |
| Cd(1)-O(3)                    | 2.462(9)  |                               |           |
| N(2) <sup>a</sup> -Cd(1)-N(1) | 95.6(3)   | N(2) <sup>a</sup> -Cd(1)-N(3) | 91.7(4)   |
| N(1)-Cd(1)-N(3)               | 172.6(4)  | N(2) <sup>a</sup> -Cd(1)-O(4) | 138.6(3)  |
| N(1)-Cd(1)-O(4)               | 85.6(3)   | N(3)-Cd(1)-O(4)               | 88.3(4)   |
| N(2) <sup>a</sup> -Cd(1)-O(2) | 137.2(3)  | N(1)-Cd(1)-O(2)               | 90.0(4)   |
| N(3)-Cd(1)-O(2)               | 85.2(4)   | O(4)-Cd(1)-O(2)               | 84.0(3)   |

|                               |         |                               |          |
|-------------------------------|---------|-------------------------------|----------|
| N(2) <sup>a</sup> -Cd(1)-O(1) | 84.8(3) | N(1)-Cd(1)-O(1)               | 85.3(4)  |
| N(3)-Cd(1)-O(1)               | 96.3(4) | O(4)-Cd(1)-O(1)               | 136.3(3) |
| O(2)-Cd(1)-O(1)               | 53.3(3) | N(2) <sup>a</sup> -Cd(1)-O(3) | 84.9(3)  |
| N(1)-Cd(1)-O(3)               | 92.3(4) | N(3)-Cd(1)-O(3)               | 87.5(4)  |
| O(4)-Cd(1)-O(3)               | 53.8(3) | O(2)-Cd(1)-O(3)               | 137.4(3) |
| O(1)-Cd(1)-O(3)               |         |                               |          |

Symmetry codes: (a):  $x, 1+y, z$ .

**Table S3** Selected bond lengths (Å) and angles (°) for **3**.

|                               |           |                                |            |
|-------------------------------|-----------|--------------------------------|------------|
| Cd(1)-O(1w)                   | 2.273(5)  | Cd(1)-N(2) <sup>a</sup>        | 2.304(6)   |
| Cd(1)-O(2)                    | 2.339(5)  | Cd(1)-N(1)                     | 2.344(6)   |
| Cd(1)-O(1)                    | 2.440(5)  | Cd(1)-O(7)                     | 2.455(7)   |
| Cd(1)-O(8)                    | 2.565(7)  | Cd(2)-O(6)                     | 2.241(7)   |
| Cd(2)-O(4)                    | 2.318(6)  | Cd(2)-N(4) <sup>b</sup>        | 2.338(7)   |
| Cd(2)-N(3)                    | 2.355(6)  | Cd(2)-O(2w)                    | 2.357(8)   |
| Cd(2)-O(3)                    | 2.530(6)  | O(1w)-O1                       | 2.7543     |
| O(1w)-Cd(1)-N(2) <sup>a</sup> | 175.0(2)  | O(1w)-Cd(1)-O(2)               | 89.6(2)    |
| N(2) <sup>a</sup> -Cd(1)-O(2) | 95.2(2)   | O(1w)-Cd(1)-N(1)               | 88.76(19)  |
| N(2) <sup>a</sup> -Cd(1)-N(1) | 92.8(2)   | O(2)-Cd(1)-N(1)                | 85.5(2)    |
| O(1w)-Cd(1)-O(1)              | 89.75(18) | N(2) <sup>a</sup> -Cd(1)-O(1)  | 92.0(2)    |
| O(2)-Cd(1)-O(1)               | 54.31(18) | N(1)-Cd(1)-O(1)                | 139.78(19) |
| O(1w)-Cd(1)-O(7)              | 87.7(2)   | N(2) <sup>a</sup> -Cd(1)-O(7)  | 87.9(2)    |
| O(2)-Cd(1)-O(7)               | 139.5(2)  | N(1)-Cd(1)-O(7)                | 134.7(2)   |
| O(1)-Cd(1)-O(7)               | 85.3(2)   | O(1w)-Cd(1)-O(8)               | 87.6(2)    |
| N(2) <sup>a</sup> -Cd(1)-O(8) | 87.9(2)   | O(2)-Cd(1)-O(8)                | 169.8(2)   |
| N(1)-Cd(1)-O(8)               | 84.7(2)   | O(1)-Cd(1)-O(8)                | 135.43(19) |
| O(7)-Cd(1)-O(8)               | 50.1(2)   | O(6)-Cd(2)-O(4)                | 138.6(2)   |
| O(6)-Cd(2)-N(4) <sup>b</sup>  | 97.8(3)   | O(4)-Cd(2)-N(4) <sup>b</sup>   | 91.7(2)    |
| O(6)-Cd(2)-N(3)               | 130.5(3)  | O(4)-Cd(2)-N(3)                | 89.3(2)    |
| N(4) <sup>b</sup> -Cd(2)-N(3) | 90.6(2)   | O(6)-Cd(2)-O(2w)               | 88.4(4)    |
| O(4)-Cd(2)-O(2w)              | 82.7(3)   | N(4) <sup>b</sup> -Cd(2)-O(2w) | 173.6(3)   |
| N(3)-Cd(2)-O(2w)              | 86.5(2)   | O(6)-Cd(2)-O(3)                | 86.6(2)    |
| O(4)-Cd(2)-O(3)               | 53.23(18) | N(4) <sup>b</sup> -Cd(2)-O(3)  | 88.9(2)    |
| N(3)-Cd(2)-O(3)               | 142.5(2)  | O(2w)-Cd(2)-O(3)               | 90.0(2)    |
| O(1w)-H1wb...O1               | 171       |                                |            |

Symmetry codes: (a):  $0.5-x, -0.5+y, 0.5-z$ ; (b):  $0.5-x, 0.5+y, 0.5-z$ .

**Table S4** Selected bond lengths (Å) and angles (°) for **4**.

|                         |          |            |          |
|-------------------------|----------|------------|----------|
| Cd(1)-N(2) <sup>a</sup> | 2.369(7) | Cd(1)-N(3) | 2.379(8) |
|-------------------------|----------|------------|----------|

|                               |            |                                            |           |
|-------------------------------|------------|--------------------------------------------|-----------|
| Cd(1)-O(4) <sup>b</sup>       | 2.400(6)   | Cd(1)-N(1)                                 | 2.404(7)  |
| Cd(1)-O(2)                    | 2.417(6)   | Cd(1)-O(1)                                 | 2.424(6)  |
| Cd(1)-O(3) <sup>b</sup>       | 2.442(6)   |                                            |           |
| N(3)-Cd(1)-O(4) <sup>b</sup>  | 89.1(3)    | N(2) <sup>a</sup> -Cd(1)-N(1)              | 93.2(2)   |
| N(3)-Cd(1)-N(1)               | 88.5(3)    | O(4) <sup>b</sup> -Cd(1)-N(1)              | 83.0(2)   |
| N(2) <sup>a</sup> -Cd(1)-O(2) | 90.1(2)    | N(3)-Cd(1)-O(2)                            | 89.2(2)   |
| O(4) <sup>b</sup> -Cd(1)-O(2) | 141.5(2)   | N(1)-Cd(1)-O(2)                            | 135.4(2)  |
| N(2) <sup>a</sup> -Cd(1)-O(1) | 90.7(2)    | N(3)-Cd(1)-O(1)                            | 90.3(3)   |
| O(4) <sup>b</sup> -Cd(1)-O(1) | 164.6(2)   | N(1)-Cd(1)-O(1)                            | 81.7(2)   |
| O(2)-Cd(1)-O(1)               | 53.9(2)    | N(2) <sup>a</sup> -Cd(1)-O(3) <sup>a</sup> | 88.9(2)   |
| N(3)-Cd(1)-O(3) <sup>b</sup>  | 89.4(2)    | O(4) <sup>b</sup> -Cd(1)-O(3) <sup>b</sup> | 53.6(2)   |
| N(1)-Cd(1)-O(3) <sup>b</sup>  | 136.6(2)   | O(2)-Cd(1)-O(3) <sup>b</sup>               | 87.89(19) |
| O(1)-Cd(1)-O(3) <sup>b</sup>  | 141.75(19) |                                            |           |

Symmetry codes: (a): 0.5+x, 0.5+y, z; (b): 0.5-x, 0.5+y, -0.5-z.

**Table S5** Selected bond lengths (Å) and angles (°) for **5**.

|                               |            |                               |            |
|-------------------------------|------------|-------------------------------|------------|
| Cd(1)-O(3)                    | 2.272(4)   | Cd(1)-N(1)                    | 2.334(5)   |
| Cd(1)-N(2) <sup>a</sup>       | 2.361(5)   | Cd(1)-N(3)                    | 2.390(5)   |
| Cd(1)-O(2)                    | 2.443(4)   | Cd(1)-O(1)                    | 2.488(5)   |
| Cd(1)-O(4)                    | 2.744(5)   |                               |            |
| O(3)-Cd(1)-N(1)               | 90.18(18)  | O(3)-Cd(1)-N(2) <sup>a</sup>  | 137.62(16) |
| N(1)-Cd(1)-N(2) <sup>a</sup>  | 88.21(19)  | O(3)-Cd(1)-N(3)               | 87.25(17)  |
| N(1)-Cd(1)-N(3)               | 177.17(19) | N(2) <sup>a</sup> -Cd(1)-N(3) | 94.50(19)  |
| O(3)-Cd(1)-O(2)               | 139.51(15) | N(1)-Cd(1)-O(2)               | 95.23(17)  |
| N(2) <sup>a</sup> -Cd(1)-O(2) | 82.74(16)  | N(3)-Cd(1)-O(2)               | 85.96(16)  |
| O(3)-Cd(1)-O(1)               | 87.12(16)  | N(1)-Cd(1)-O(1)               | 92.20(17)  |
| N(2) <sup>a</sup> -Cd(1)-O(1) | 135.26(16) | N(3)-Cd(1)-O(1)               | 86.47(18)  |
| O(2)-Cd(1)-O(1)               | 92.72(18)  | O(3)-Cd(1)-O(4)               | 50.67(14)  |
| N(1)-Cd(1)-O(4)               | 92.72(18)  | N(2) <sup>a</sup> -Cd(1)-O(4) | 87.10(15)  |
| N(3)-Cd(1)-O(4)               | 86.58(17)  | O(2)-Cd(1)-O(4)               | 166.87(14) |
| O(1)-Cd(1)-O(4)               | 137.48(14) |                               |            |

Symmetry codes: (a): 0.5+x, 0.5+y, z.

**Table S6** Selected bond lengths (Å) and angles (°) for **6**.

|             |          |                         |            |
|-------------|----------|-------------------------|------------|
| Cd(1)-O(1w) | 2.338(3) | Cd(1)-N(1)              | 2.382(3)   |
| Cd(1)-O(2)  | 2.389(2) | Cd(1)-O(4)              | 2.397(3)   |
| Cd(1)-N(3)  | 2.419(3) | Cd(1)-O(1)              | 2.446(2)   |
| Cd(1)-O(3)  | 2.451(3) | Cd(2)-O(2w)             | 2.341(3)   |
| Cd(2)-N(4)  | 2.359(3) | Cd(2)-N(2) <sup>a</sup> | 2.362(3)   |
| Cd(2)-O(6)  | 2.368(2) | Cd(2)-O(7)              | Cd(2)-O(7) |

|                               |           |                               |            |
|-------------------------------|-----------|-------------------------------|------------|
| Cd(2)-O(8)                    | 2.508(3)  | Cd(2)-O(5)                    | 2.510(3)   |
| O(1w)-Cd(1)-N(1)              | 81.37(9)  | O(1w)-Cd(1)-O(2)              | 143.40(9)  |
| N(1)-Cd(1)-O(2)               | 100.25(9) | O(1w)-Cd(1)-O(4)              | 130.60(10) |
| N(1)-Cd(1)-O(4)               | 84.67(9)  | O(2)-Cd(1)-O(4)               | 85.68(9)   |
| O(1w)-Cd(1)-N(3)              | 79.16(10) | N(1)-Cd(1)-N(3)               | 157.22(9)  |
| O(2)-Cd(1)-N(3)               | 88.57(9)  | O(4)-Cd(1)-N(3)               | 117.15(10) |
| O(1w)-Cd(1)-O(1)              | 90.14(9)  | N(1)-Cd(1)-O(1)               | 83.87(9)   |
| O(2)-Cd(1)-O(1)               | 54.16(8)  | O(4)-Cd(1)-O(1)               | 135.04(8)  |
| N(3)-Cd(1)-O(1)               | 84.46(9)  | O(1w)-Cd(1)-O(3)              | 87.51(9)   |
| N(1)-Cd(1)-O(3)               | 109.03(9) | O(2)-Cd(1)-O(3)               | 124.99(9)  |
| O(4)-Cd(1)-O(3)               | 53.28(8)  | N(3)-Cd(1)-O(3)               | 81.89(9)   |
| O(1)-Cd(1)-O(3)               | 166.35(8) | O(2w)-Cd(2)-N(4)              | 86.61(10)  |
| O(2w)-Cd(2)-N(2) <sup>a</sup> | 81.82(10) | N(4)-Cd(2)-N(2) <sup>a</sup>  | 168.38(10) |
| O(2w)-Cd(2)-O(6)              | 138.67(9) | N(4)-Cd(2)-O(6)               | 86.14(9)   |
| N(2) <sup>a</sup> -Cd(2)-O(6) | 103.19(9) | O(2w)-Cd(2)-O(7)              | 84.59(9)   |
| N(4)-Cd(2)-O(7)               | 86.89(9)  | N(2) <sup>a</sup> -Cd(2)-O(7) | 91.07(9)   |
| O(6)-Cd(2)-O(7)               | 135.44(9) | O(2w)-Cd(2)-O(8)              | 133.78(10) |
| N(4)-Cd(2)-O(8)               | 106.62(9) | N(2) <sup>a</sup> -Cd(2)-O(8) | 81.06(10)  |
| O(6)-Cd(2)-O(8)               | 87.12(8)  | O(7)-Cd(2)-O(8)               | 53.28(8)   |
| O(2w)-Cd(2)-O(5)              | 88.73(9)  | N(4)-Cd(2)-O(5)               | 100.44(9)  |
| N(2) <sup>a</sup> -Cd(2)-O(5) | 80.32(9)  | O(6)-Cd(2)-O(5)               | 52.95(8)   |
| O(7)-Cd(2)-O(5)               | 169.78(9) | O(8)-Cd(2)-O(5)               | 129.63(8)  |

Symmetry codes: (a):  $x, y, -1+z$ .

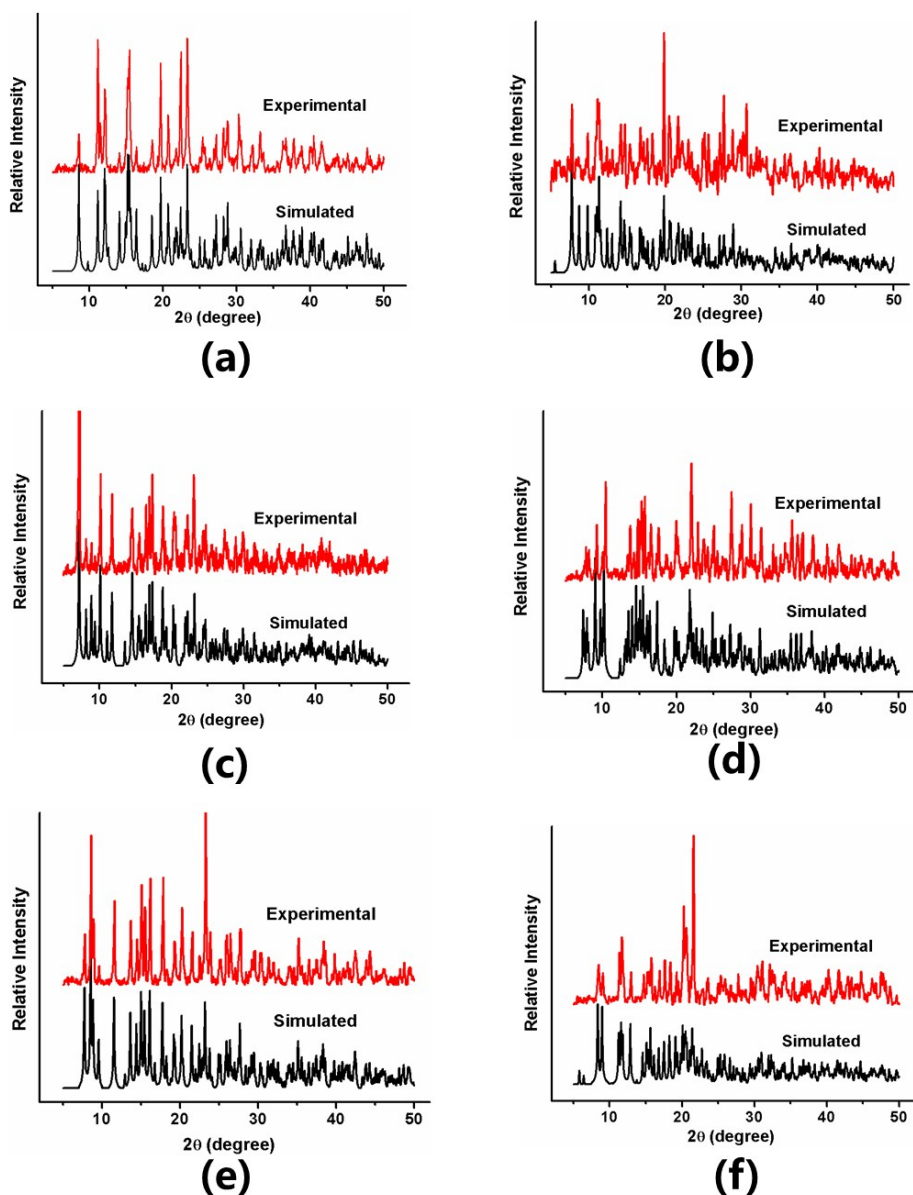

**Figure S1.** The simulated and experimental XRD patterns of each compound (a) for 1, (b) for 2, (c) for 3, (d) for 4, (e) for 5, and (f) for 6.

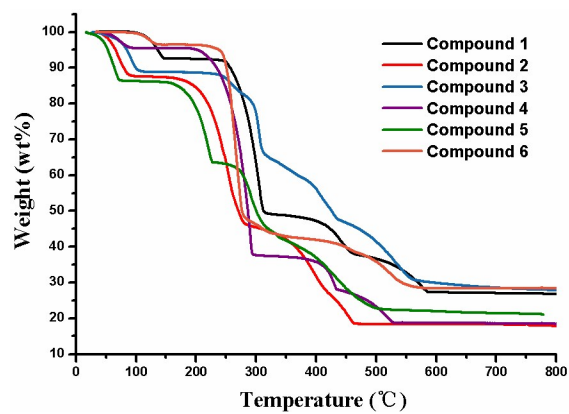

**Figure S2.** TG curves of compounds 1-6.
